# Supplementary material for: Bibliometric analysis of bone metastases from lung cancer research from 2004 to 2023
Source: Front Oncol. 2024 Aug 6;14:1439209. doi: 10.3389/fonc.2024.1439209 (PMC11333251; doi:10.3389/fonc.2024.1439209)
Supplement: Supplementary file 2 [file Table_2.xlsx]

## Sheet: Author's keywords
item	freq	year_q1	year_med	year_q3
bone metastasis	247	2014	2018	2021
lung cancer	222	2012	2017	2021
bone metastases	147	2012	2016	2020
non-small cell lung cancer	117	2014	2018	2021
nsclc	54	2014	2020	2021
zoledronic acid	54	2010	2013	2016
prognosis	52	2019	2020	2021
metastasis	49	2014	2017	2021
survival	41	2013	2016	2020
skeletal-related events	34	2013	2016	2019
non-small-cell lung cancer	31	2014	2018	2020
radiotherapy	29	2012	2020	2022
bisphosphonates	29	2008	2010	2013
small cell lung cancer	27	2016	2019	2021
non-small cell lung cancer (nsclc)	25	2020	2022	2022
immunotherapy	24	2021	2022	2023
osteoclast	18	2010	2012	2020
epidermal growth factor receptor	17	2016	2017	2020
breast cancer	17	2011	2015	2019
nomogram	15	2021	2021	2022
lung neoplasms	15	2012	2014	2018
osimertinib	13	2021	2022	2023
bone	12	2010	2013	2019
skeletal-related event	12	2013	2015	2016
epidemiology	11	2020	2021	2022
immune checkpoint inhibitor	11	2020	2021	2022
bisphosphonate	11	2006	2011	2020
osteolysis	11	2010	2014	2020
gefitinib	11	2010	2012	2016
bone scintigraphy	11	2009	2012	2012
meta-analysis	8	2012	2015	2019
pet/ct	8	2009	2010	2012
lung	7	2016	2019	2020
migration	7	2016	2019	2020
bone markers	7	2010	2011	2012
bevacizumab	6	2012	2013	2019
bone turnover markers	6	2009	2014	2018
staging	6	2007	2009	2012
bone pain	5	2007	2011	2016
hypercalcemia	5	2006	2007	2011

## Sheet: Abstracts (trigram)
item	freq	year_q1	year_med	year_q3
cell lung cancer	395	2014	2019	2021
non-small cell lung	318	2015	2019	2021
lung cancer nsclc	304	2015	2019	2021
lung cancer patients	238	2014	2018	2021
growth factor receptor	104	2016	2018	2022
non-small-cell lung cancer	90	2014	2017	2020
lung cancer cells	86	2014	2018	2020
skeletal-related events sres	69	2013	2016	2021
spinal cord compression	65	2013	2016	2020
progression-free survival pfs	53	2019	2021	2022
factor receptor egfr	50	2016	2017	2021
independent prognostic factors	44	2016	2020	2022
lung cancer cell	41	2012	2016	2020
receiver operating characteristic	39	2016	2021	2022
advanced non-small cell	38	2017	2020	2022
advanced nsclc patients	38	2020	2022	2023
metastatic bone disease	37	2010	2014	2019
tyrosine kinase inhibitors	36	2017	2020	2021
lung cancer metastasis	34	2011	2017	2021
immune checkpoint inhibitors	33	2021	2022	2022
primary lung cancer	32	2014	2021	2023
positron emission tomography	29	2011	2013	2018
osteolytic bone metastasis	23	2011	2015	2020
cancer cell lines	22	2012	2013	2020
checkpoint inhibitors icis	21	2021	2022	2023
human lung cancer	18	2012	2013	2017
parathyroid hormone-related protein	17	2010	2012	2014
zoledronic acid zol	15	2010	2011	2012
tartrate-resistant acid phosphatase	15	2010	2015	2019
bone metastases secondary	13	2011	2014	2016
cell lung carcinoma	13	2011	2014	2021
lung cancer lc	12	2014	2015	2021
randomized phase iii	11	2005	2005	2005
f- fdg petct	11	2010	2010	2010
hormone-related protein pthrp	11	2010	2012	2014
emission tomography pet	9	2007	2011	2015
pathologic fractures spinal	9	2009	2011	2021
including lung cancer	9	2005	2012	2021
serum tumor markers	9	2021	2023	2023
phase iii trial	8	2005	2005	2005
bone-specific alkaline phosphatase	8	2005	2008	2012
fracture spinal cord	8	2006	2010	2013
vertebral body height	8	2023	2023	2023
lung cancer metastases	7	2006	2006	2016
malignant bone disease	7	2006	2007	2007
severe combined immunodeficient	7	2007	2009	2010
nsclc patients receiving	7	2023	2023	2023
adenocarcinoma cell line	6	2008	2009	2015
cord compression hypercalcemia	6	2007	2009	2017
phase iii trials	5	2005	2005	2010
factor receptor inhibitor	5	2008	2008	2008
solid tumors including	5	2005	2008	2009
cna alpha gene	5	2010	2010	2011
